# Supplementary material for: Deep Sequencing of RNA from Three Different Extracellular Vesicle (EV) Subtypes Released from the Human LIM1863 Colon Cancer Cell Line Uncovers Distinct Mirna-Enrichment Signatures
Source: PubMed Central journal article supplement (PMC4201526; doi:10.1371/journal.pone.0110314), 2014-10-17

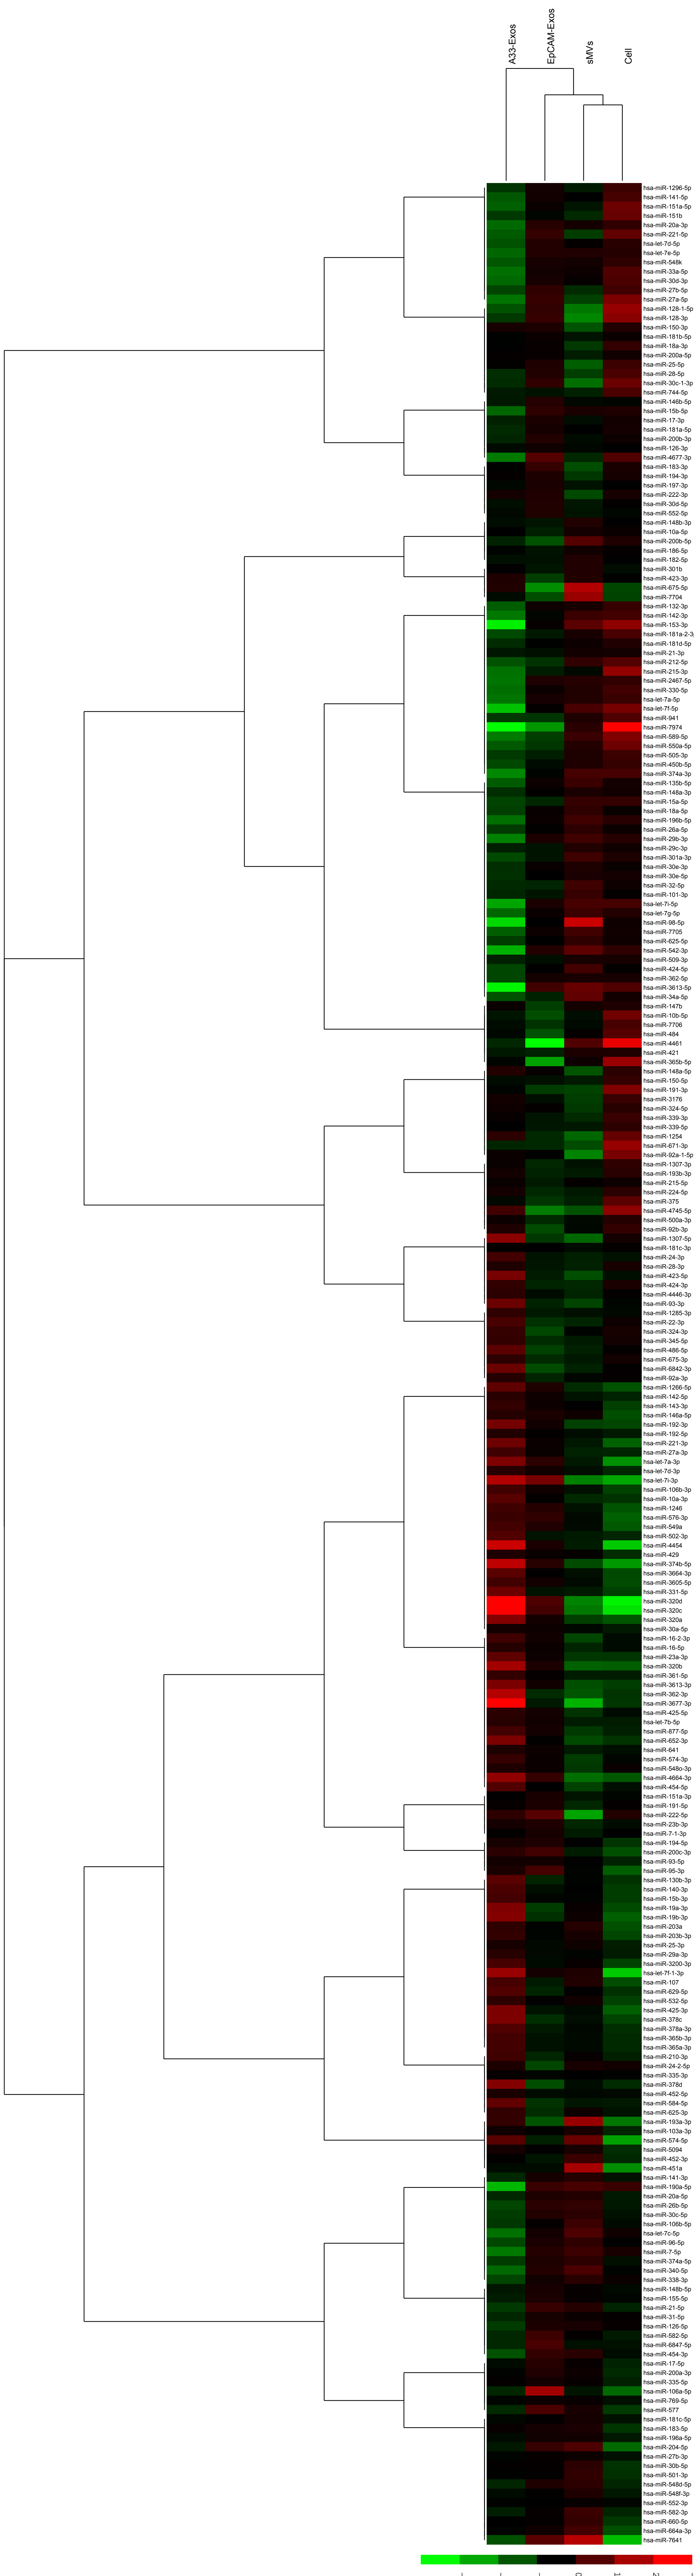

A33-Exos  
EpCAM-Exos  
sMVs  
Cell

hsa-miR-1296-5p  
hsa-miR-141-5p  
hsa-miR-151a-5p  
hsa-miR-151b  
hsa-miR-20a-3p  
hsa-miR-221-5p  
hsa-let-7d-5p  
hsa-let-7e-5p  
hsa-miR-548k  
hsa-miR-33a-5p  
hsa-miR-30d-3p  
hsa-miR-27b-5p  
hsa-miR-27a-5p  
hsa-miR-128-3p  
hsa-miR-150-3p  
hsa-miR-181b-5p  
hsa-miR-18a-3p  
hsa-miR-200a-5p  
hsa-miR-25-5p  
hsa-miR-28-5p  
hsa-miR-30c-1-3p  
hsa-miR-744-5p  
hsa-miR-146b-5p  
hsa-miR-15b-5p  
hsa-miR-17-3p  
hsa-miR-181a-5p  
hsa-miR-200b-3p  
hsa-miR-126-3p  
hsa-miR-4677-3p  
hsa-miR-183-3p  
hsa-miR-194-3p  
hsa-miR-197-3p  
hsa-miR-222-3p  
hsa-miR-30d-5p  
hsa-miR-552-5p  
hsa-miR-148b-3p  
hsa-miR-10a-5p  
hsa-miR-200b-5p  
hsa-miR-186-5p  
hsa-miR-182-5p  
hsa-miR-301b  
hsa-miR-423-3p  
hsa-miR-675-5p  
hsa-miR-7704  
hsa-miR-132-3p  
hsa-miR-142-3p  
hsa-miR-153-3p  
hsa-miR-181a-2-3p  
hsa-miR-181d-5p  
hsa-miR-212-3p  
hsa-miR-212-5p  
hsa-miR-215-3p  
hsa-miR-2467-5p  
hsa-miR-330-5p  
hsa-let-7a-5p  
hsa-let-7f-5p  
hsa-miR-941  
hsa-miR-7974  
hsa-miR-589-5p  
hsa-miR-550a-5p  
hsa-miR-505-3p  
hsa-miR-450b-5p  
hsa-miR-374a-3p  
hsa-miR-135b-5p  
hsa-miR-148a-3p  
hsa-miR-15a-5p  
hsa-miR-18a-5p  
hsa-miR-190b-5p  
hsa-miR-28a-5p  
hsa-miR-29b-3p  
hsa-miR-29c-3p  
hsa-miR-301a-3p  
hsa-miR-30e-3p  
hsa-miR-30e-5p  
hsa-miR-32-5p  
hsa-miR-101-3p  
hsa-let-7i-5p  
hsa-let-7g-5p  
hsa-miR-98-5p  
hsa-miR-7705  
hsa-miR-625-5p  
hsa-miR-542-3p  
hsa-miR-509-3p  
hsa-miR-424-5p  
hsa-miR-362-5p  
hsa-miR-3613-5p  
hsa-miR-34a-5p  
hsa-miR-147b  
hsa-miR-10b-5p  
hsa-miR-7706  
hsa-miR-484  
hsa-miR-4461  
hsa-miR-421  
hsa-miR-365b-5p  
hsa-miR-148a-5p  
hsa-miR-150-5p  
hsa-miR-191-3p  
hsa-miR-3176  
hsa-miR-324-5p  
hsa-miR-339-3p  
hsa-miR-339-5p  
hsa-miR-1254  
hsa-miR-671-3p  
hsa-miR-92a-1-5p  
hsa-miR-1307-3p  
hsa-miR-193b-3p  
hsa-miR-215-5p  
hsa-miR-224-5p  
hsa-miR-375  
hsa-miR-4745-5p  
hsa-miR-500a-3p  
hsa-miR-92b-3p  
hsa-miR-1307-5p  
hsa-miR-181c-3p  
hsa-miR-24-3p  
hsa-miR-28-3p  
hsa-miR-423-5p  
hsa-miR-424-3p  
hsa-miR-4446-3p  
hsa-miR-93-3p  
hsa-miR-1285-3p  
hsa-miR-22-3p  
hsa-miR-324-3p  
hsa-miR-345-5p  
hsa-miR-486-5p  
hsa-miR-675-3p  
hsa-miR-6842-3p  
hsa-miR-92a-3p  
hsa-miR-1266-5p  
hsa-miR-142-5p  
hsa-miR-143-3p  
hsa-miR-146a-5p  
hsa-miR-192-3p  
hsa-miR-192-5p  
hsa-miR-221-3p  
hsa-miR-27a-3p  
hsa-let-7a-3p  
hsa-let-7d-3p  
hsa-let-7i-3p  
hsa-miR-106b-3p  
hsa-miR-10a-3p  
hsa-miR-124b  
hsa-miR-576-3p  
hsa-miR-549a  
hsa-miR-502-3p  
hsa-miR-4454  
hsa-miR-429  
hsa-miR-374b-5p  
hsa-miR-3664-3p  
hsa-miR-3605-5p  
hsa-miR-331-5p  
hsa-miR-320d  
hsa-miR-320c  
hsa-miR-320a  
hsa-miR-30a-5p  
hsa-miR-16-2-3p  
hsa-miR-16-5p  
hsa-miR-23a-3p  
hsa-miR-320b  
hsa-miR-361-5p  
hsa-miR-3613-3p  
hsa-miR-362-3p  
hsa-miR-3677-3p  
hsa-miR-425-5p  
hsa-let-7b-5p  
hsa-miR-877-5p  
hsa-miR-652-3p  
hsa-miR-641  
hsa-miR-574-3p  
hsa-miR-5480-3p  
hsa-miR-4664-3p  
hsa-miR-454-5p  
hsa-miR-151a-3p  
hsa-miR-191-5p  
hsa-miR-222-5p  
hsa-miR-23b-3p  
hsa-miR-7-1-3p  
hsa-miR-194-5p  
hsa-miR-200c-3p  
hsa-miR-93-5p  
hsa-miR-95-3p  
hsa-miR-130b-3p  
hsa-miR-140-3p  
hsa-miR-15b-3p  
hsa-miR-19a-3p  
hsa-miR-19b-3p  
hsa-miR-203a  
hsa-miR-203b-3p  
hsa-miR-25-3p  
hsa-miR-29a-3p  
hsa-miR-3200-3p  
hsa-let-7f-1-3p  
hsa-miR-107  
hsa-miR-629-5p  
hsa-miR-532-5p  
hsa-miR-425-3p  
hsa-miR-378c  
hsa-miR-378a-3p  
hsa-miR-365b-3p  
hsa-miR-365a-3p  
hsa-miR-210-3p  
hsa-miR-24-2-5p  
hsa-miR-335-3p  
hsa-miR-378d  
hsa-miR-452-5p  
hsa-miR-584-5p  
hsa-miR-625-3p  
hsa-miR-193a-3p  
hsa-miR-103a-3p  
hsa-miR-574-5p  
hsa-miR-5094  
hsa-miR-452-3p  
hsa-miR-451a  
hsa-miR-141-3p  
hsa-miR-190a-5p  
hsa-miR-20a-5p  
hsa-miR-26b-5p  
hsa-miR-30c-5p  
hsa-miR-106b-5p  
hsa-let-7c-5p  
hsa-miR-96-5p  
hsa-miR-7-5p  
hsa-miR-374a-5p  
hsa-miR-340-5p  
hsa-miR-338-3p  
hsa-miR-148b-5p  
hsa-miR-155-5p  
hsa-miR-21-5p  
hsa-miR-31-5p  
hsa-miR-126-5p  
hsa-miR-582-5p  
hsa-miR-6847-5p  
hsa-miR-454-3p  
hsa-miR-17-5p  
hsa-miR-200a-3p  
hsa-miR-335-5p  
hsa-miR-106a-5p  
hsa-miR-769-5p  
hsa-miR-577  
hsa-miR-181c-5p  
hsa-miR-183-5p  
hsa-miR-196a-5p  
hsa-miR-204-5p  
hsa-miR-27b-3p  
hsa-miR-30b-5p  
hsa-miR-501-3p  
hsa-miR-548d-5p  
hsa-miR-548f-3p  
hsa-miR-552-3p  
hsa-miR-690-5p  
hsa-miR-664a-3p  
hsa-miR-7641

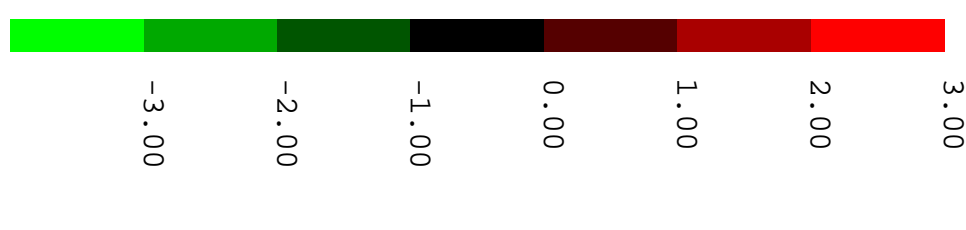

Supplement: pone.0110314.s001.pdf [file pone.0110314.s001.pdf]
