# Supplementary material for: Deep Sequencing of RNA from Three Different Extracellular Vesicle (EV) Subtypes Released from the Human LIM1863 Colon Cancer Cell Line Uncovers Distinct Mirna-Enrichment Signatures
Source: PubMed Central journal article supplement (PMC4201526; doi:10.1371/journal.pone.0110314), 2014-10-17

Supplementary Figure S2

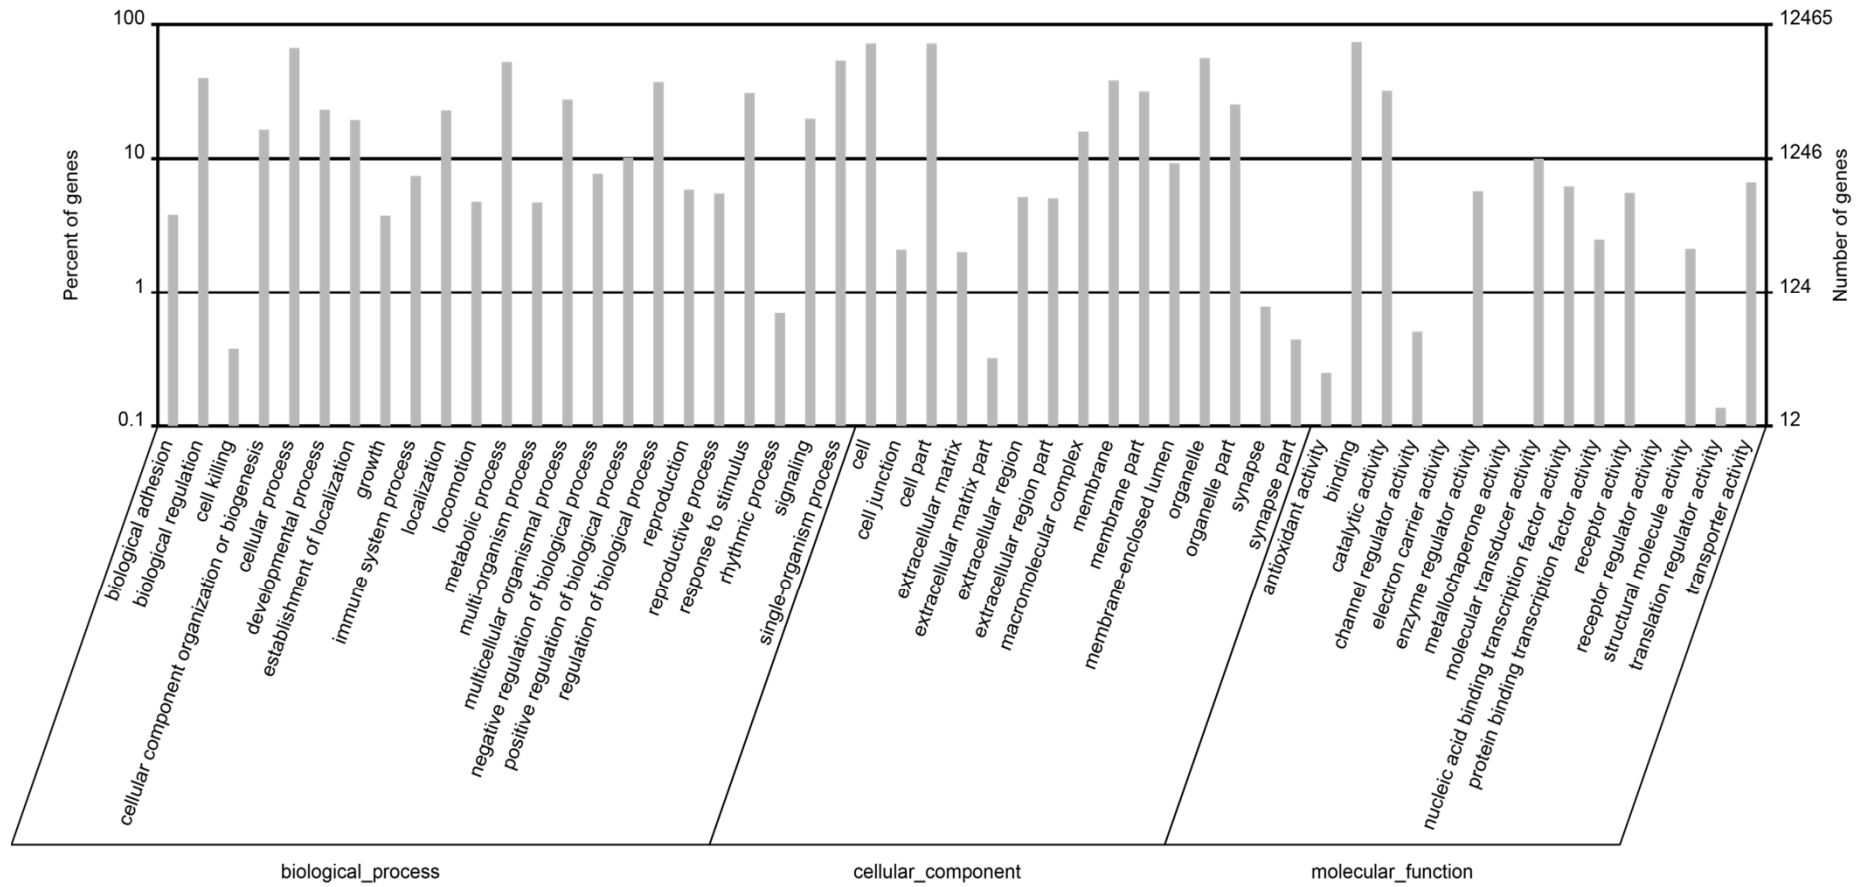

Supplement: pone.0110314.s002.pdf [file pone.0110314.s002.pdf]
